# Supplementary material
Source: PubMed Central journal article supplement (PMC1913192)
Supplement: NIHMS17431-supplement-01.pdf [file NIHMS17431-supplement-01.pdf]

# **Periostin Promotes Atrioventricular Mesenchyme Matrix Invasion and Remodeling Mediated by Integrin Signaling through Rho/PI 3-Kinase**

Jonathan T. Butcher, Russel A. Norris, Stanley Hoffman, Corey Mjaatvedt, and Roger R.

Markwald

## **Supplemental Figure Legends**

Supplemental Fig. 1: Adenovirus construct to which cassettes of full length periostin overexpressing (sense, PN OX), antisense (PN  $\alpha$ S), or LacZ control were added. All viruses were driven by the constitutively active cytomegalovirus (CMV) promoter. To facilitate detection of virally produced periostin, a hemagglutinin tag was incorporated into the C-terminus of the original parent clone by PCR (asterisk).

Supplemental Fig. 2: Quantification of HH25 AV cushion mesenchyme invasion through type I collagen gels after 3 days culture. The numbers of invaded cells decreased monotonically with depth. Comparison between virus infection determined that PNOX > LacZ > PN $\alpha$ S in terms of cell numbers over almost all of the depths analyzed.

Supplemental Fig. 3: No expression of cardiac sarcomeric myosin MF20 (red color) was detected in either the invaded hanging drop aggregate cultures or in the collagen gels populated with isolated cushion mesenchymal cells, indicating no contamination by cardiomyocytes. Cells counterstained for cell nuclei (Draq-5, 1:1000).

Supplemental Fig. 4: Surface area measurements of migrating hanging drop aggregates placed on collagen I gels. No significant differences in migration area were noted between PN  $\alpha$ S, PN OX, and LacZ controls.

Supplemental Fig. 5: Phase contrast images of surface (0  $\mu$ m) and deep (-80  $\mu$ m) planes of invaded hanging drop aggregates incubated with either the PI 3-kinase inhibitor wortmannin or the Rho kinase inhibitor Y-27632. While minimal differences in cell morphology were noted at the surface of the gels, invaded cells of wortmannin treated cultures were noticeably more rounded with fewer extensions in comparison to the Y-27632 cultures (and controls as seen in Fig. 4). This suggests that PI 3-kinase may be involved in filipodia extension in invading cushion mesenchyme.

# Periostin Promotes Atrioventricular Mesenchyme Matrix Invasion and Remodeling Mediated by Integrin Signaling through Rho/PI 3-Kinase

Jonathan T. Butcher, Russell A. Norris,  
Stanley Hoffman, Corey H. Mjaatvedt,  
and Roger R. Markwald

Supplemental Figures

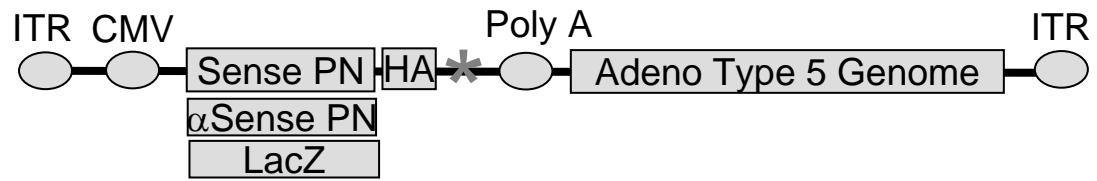

## Collagen Gel Invasion HH25 AV Cushion Cells

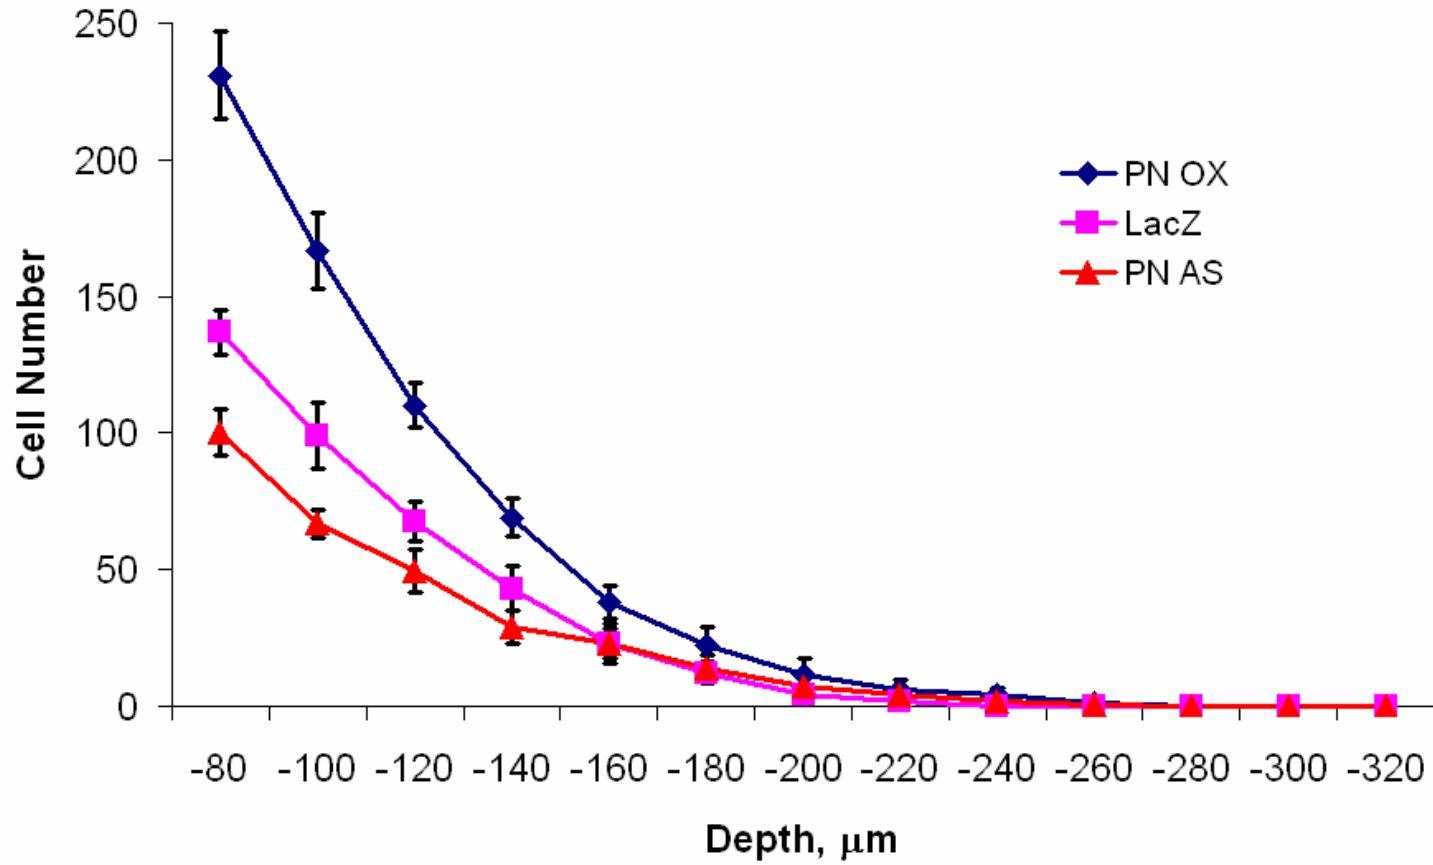

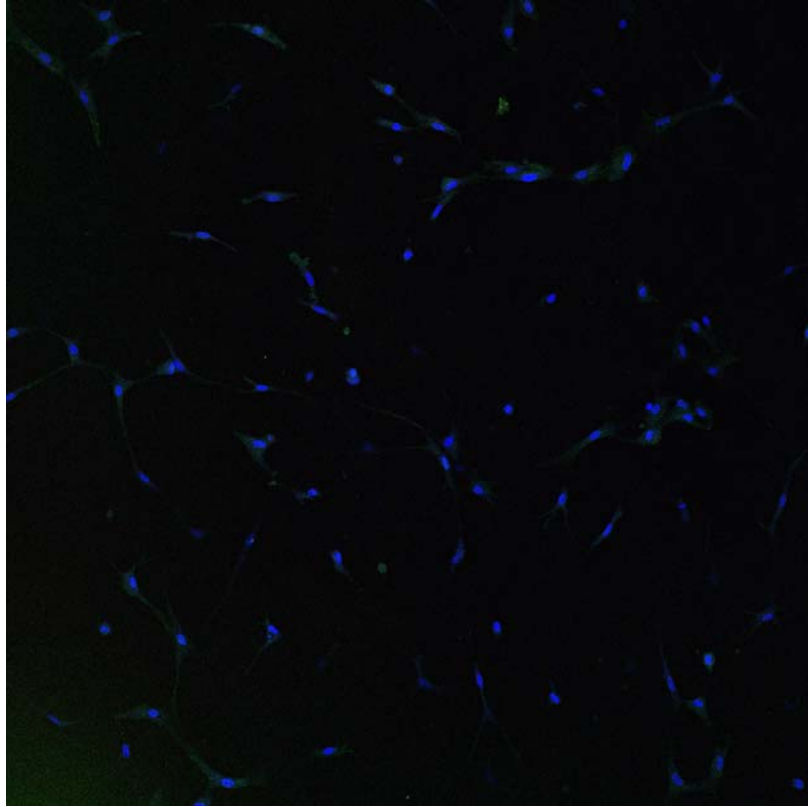

Disk Gels

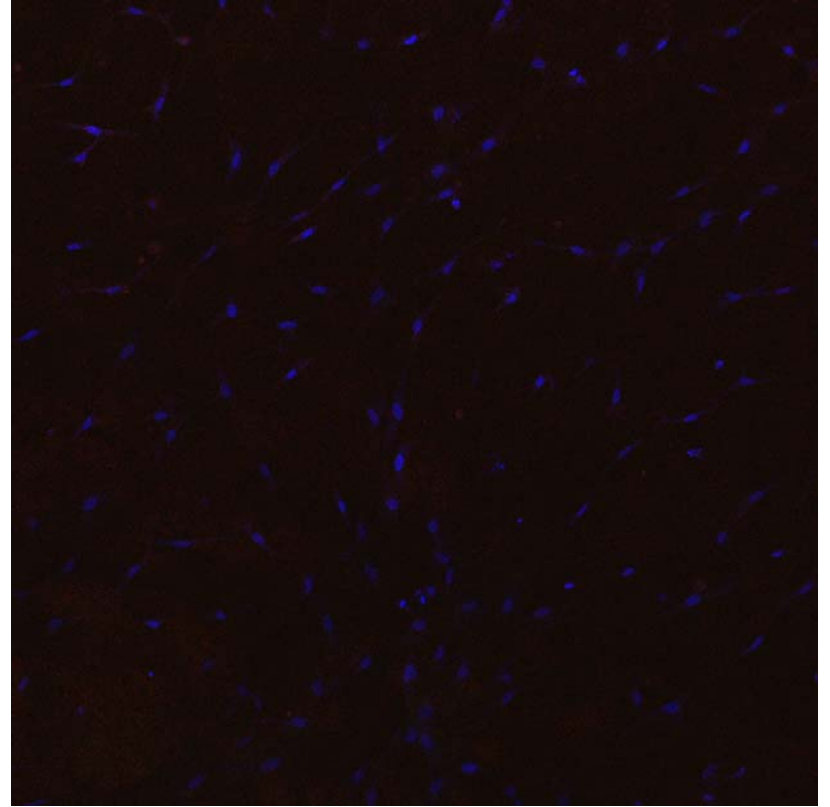

Invaded Aggregates

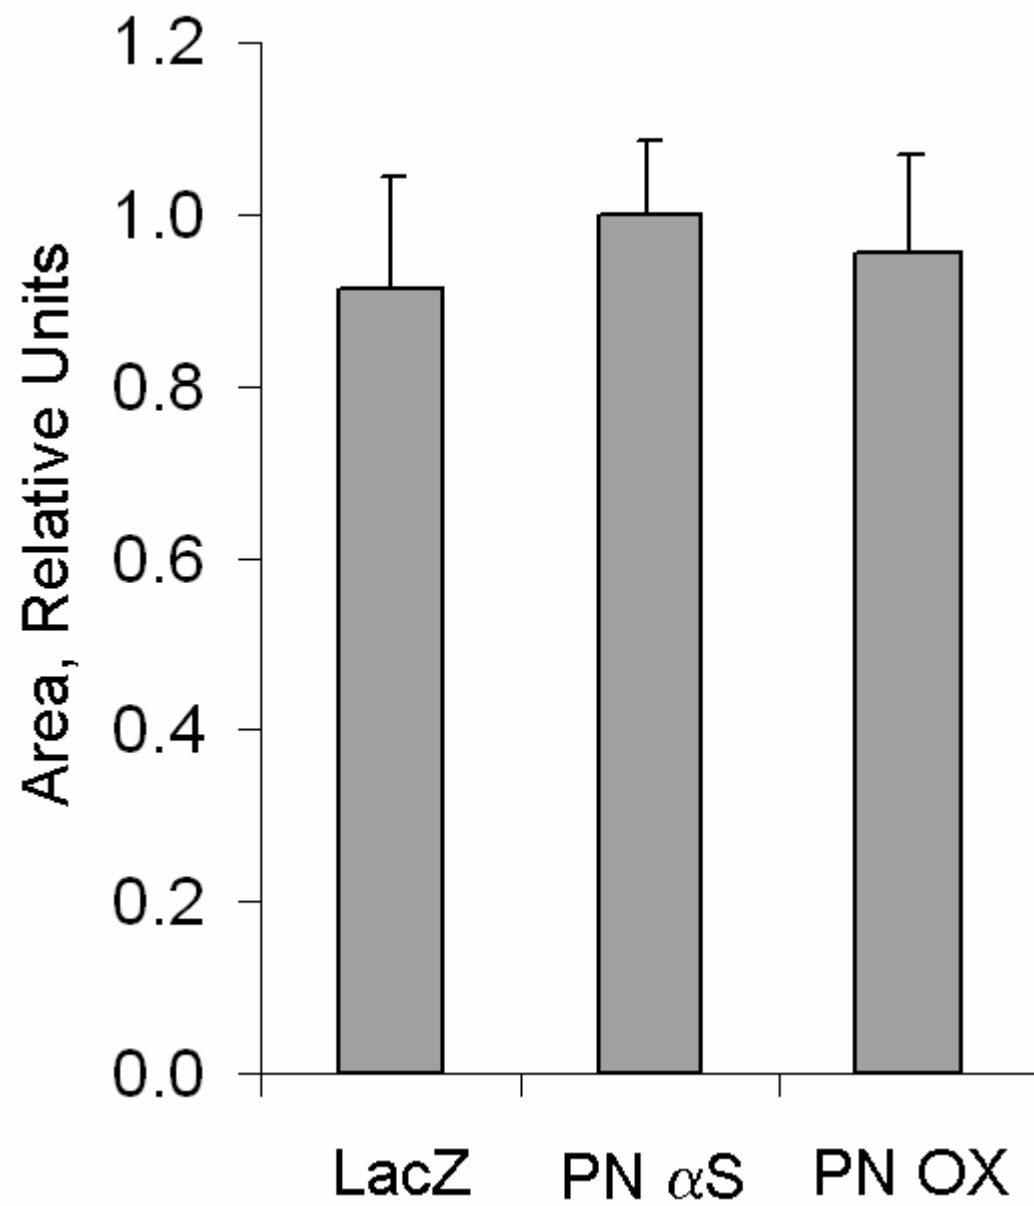

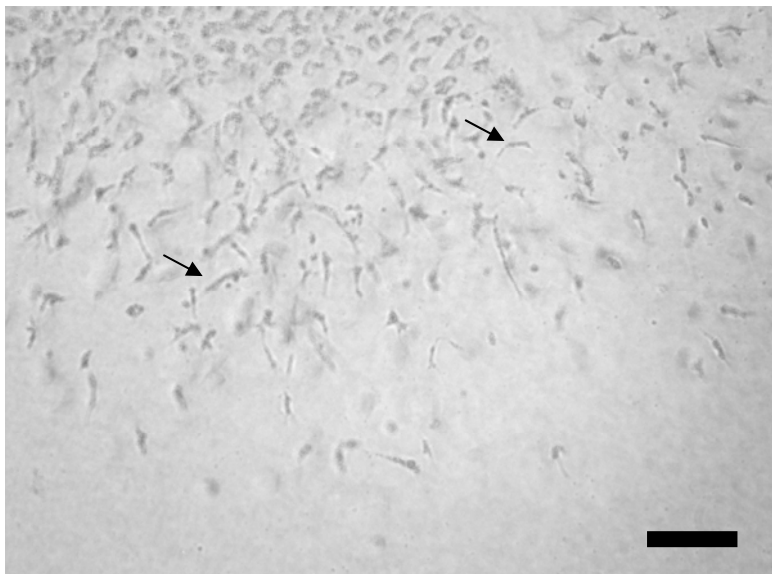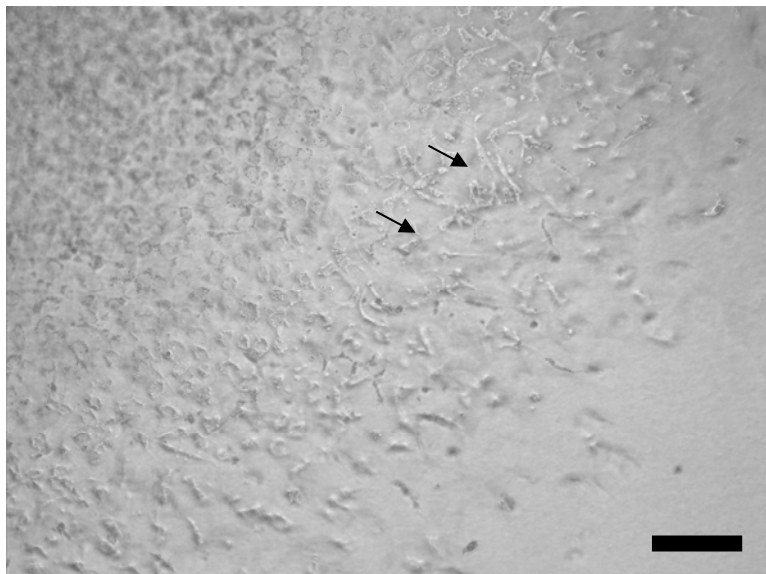

Surface

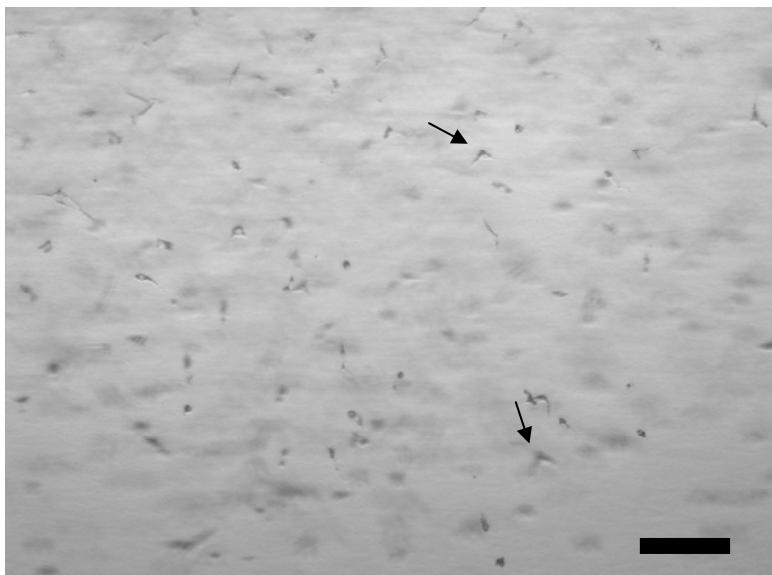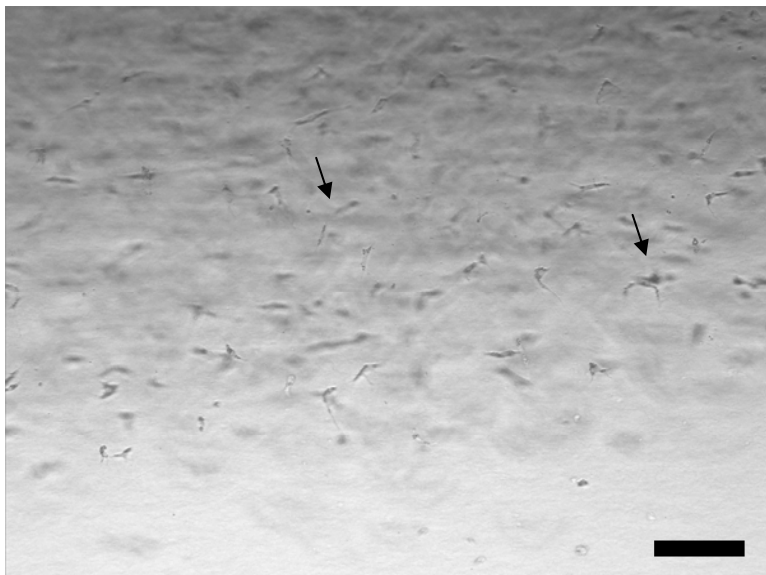

Deep

Wortmannin 1  $\mu$ M

Y-27632 5  $\mu$ M
